# Supplementary material for: Reversible hydrogen adsorption at room temperature using a molybdenum–dihydrogen complex in the solid state
Source: Royal Society of Chemistry journal article supplement (doi:10.1039/d1dt01404h), 2021-01-01
Supplement: d1dt01404h1.pdf [file d1dt01404h1.pdf]

Electrical Supplementary Information for

## Reversible Hydrogen Adsorption at Room Temperature using Molybdenum-Dihydrogen Complex in Solid State

Kaiji Uchida, Naoki Kishimoto, Shin-ichiro Noro, Hiroaki Iguchi, Shinya Takaishi

Department of Chemistry, Graduate School of Science, Tohoku University, Sendai, Miyagi 980-8578, Japan

Faculty of Environmental Earth Science, Hokkaido University, Sapporo 060-0810, Japan

### Contents

|                                                                                                                                                                                  |       |
|----------------------------------------------------------------------------------------------------------------------------------------------------------------------------------|-------|
| Experimental details                                                                                                                                                             | 2     |
| Synthesis procedures                                                                                                                                                             | 3-4   |
| Thermal transpiration correction                                                                                                                                                 | 4     |
| H <sub>2</sub> adsorption isotherms of <b>2</b> at 273-373 K                                                                                                                     | 5     |
| Langmuir plots of <b>2</b>                                                                                                                                                       | 5     |
| Fitting parameters of <b>2</b>                                                                                                                                                   | 6     |
| Repetition of the H <sub>2</sub> adsorption isotherms of <b>2</b> at 313 K                                                                                                       | 6     |
| H <sub>2</sub> adsorption isotherm of <b>1</b> at 293-333 K                                                                                                                      | 7     |
| Results of blank measurement                                                                                                                                                     | 8     |
| Comparison of N <sub>2</sub> ad/desorption isotherms of <b>1</b> and <b>2</b> at 77 K                                                                                            | 9     |
| Comparison of BET plot of <b>1</b> and <b>2</b> at 77 K                                                                                                                          | 9     |
| TGA and DSC analysis of [Mo(PCy <sub>3</sub> ) <sub>2</sub> (CO) <sub>3</sub> (N <sub>2</sub> )]                                                                                 | 10    |
| IR spectrum of <b>1</b> , <b>2</b> and [Mo(PCy <sub>3</sub> ) <sub>2</sub> (CO) <sub>3</sub> (N <sub>2</sub> )]                                                                  | 11-12 |
| PXRD pattern of <b>1</b> and <b>2</b> .                                                                                                                                          | 12    |
| Optimized structures of [Mo(PR <sub>3</sub> ) <sub>2</sub> (CO) <sub>3</sub> ] in the DFT calculation (R = Cy, iPr and Me)                                                       | 13-14 |
| Calculated parameters of [Mo(PR <sub>3</sub> ) <sub>2</sub> (CO) <sub>3</sub> ] (R = Cy, iPr and Me)                                                                             | 15    |
| Atomic coordinates of Mo-PR <sub>3</sub> and Mo-PR <sub>3</sub> -H <sub>2</sub> in optimized structure.                                                                          | 16-28 |
| Absorption spectra of [Mo(PCy <sub>3</sub> ) <sub>2</sub> (CO) <sub>3</sub> (N <sub>2</sub> )] and [Mo(PCy <sub>3</sub> ) <sub>2</sub> (CO) <sub>3</sub> ] by TD-DFT calculation | 28    |
| References                                                                                                                                                                       | 29    |

### I. General experimental information

All chemicals were used without further purification. Thermogravimetric (TG) analysis was measured using Shimadzu DTG-60H under a constant argon gas flow (100 ml/min) with a sweep rate of 5 K/min. H<sub>2</sub> and N<sub>2</sub> sorption isotherm was performed using microtracbel Belsorp Max. Detail of adsorption measurement and kinetic analysis are written later. IR

spectra were recorded as KBr pellets on a JASCO FT/IR-4200 spectrometer at room temperature. For acquiring IR spectra under inert atmosphere, the KBr pellets were fabricated in glove box (MBRAUN UNILAB1200/780) filled with Ar gas, and then the pellets were set into a specially designed sealed optical cell individually. <sup>1</sup>H NMR measurements were performed on Bruker AV500 at room temperature. Elemental analyses were performed using J-Science Lab JM-10 equipped in the research and analytical center for giant molecules at Tohoku University.

## II. Adsorption measurement

The detail of sample loading is described in the synthetic procedure of **2**. Similar procedure was used for **1** in the Ar-filled glove box. H<sub>2</sub> sorption isotherm was measured by using G1 grade (> 99.99999 %) H<sub>2</sub> gas. Sorption measurement was performed by volumetric method, and the volume of adsorbed H<sub>2</sub> gas was calculated from the ideal gas equation with second virial coefficient of  $3.436 \times 10^{-9}$ . H<sub>2</sub> sorption isotherm was measured for **1** at the temperature of 293, 313 and 333 K, and for **2** at the temperature of 273, 283, 293, 303, 313, 333, 343, 353, 363 and 373 K, respectively. Temperature control during sorption measurement was done by using Dewar bottle, circulating water cooler and brass block heater for 273K, 283-313 K and 333-373 K, respectively. Adsorption isotherm was measured in the pressure range of  $P/P_0 = 10^{-5}$ -0.997 ( $P_0 = 101.325$  kPa) and desorption isotherm was measured down to  $P/P_0 = 0.01$ . The volume of sample space was measured after sorption measurement by using G2 grade (> 99.999 %) He gas, and dead volume correction was applied to the raw data. For N<sub>2</sub> adsorption measurement, G3 grade (> 99.9995 %) N<sub>2</sub> gas was used. For H<sub>2</sub> adsorption, 802.3 and 499.6 mg of **1** and **2** were used. For N<sub>2</sub> adsorption, 189.0 and 499.6 mg of **1** and **2** were used.

## III. Kinetic analysis

Kinetic analysis of **2** was performed at the temperature of 273, 283, 293 and 303 K. H<sub>2</sub> gas was introduced into sample tube at the pressure of 90-100 Pa. Pressure of the Adsorption rate was determined as a pressure decrease rate inside of the sample tube. The data was obtained from the trend graph of BELSOPR-MAX. The detail of analysis is written in main text.

## IV. DFT calculation

DFT calculation was performed to investigate the thermodynamic properties of hydrogen adsorption with using GAUSSIAN 16 software.<sup>S1</sup> Geometry optimization and vibrational analysis were performed using B3LYP/LanL2DZ level of theory. Effective core potentials representing the 36 core electrons for molybdenum atom and 10 core electrons for phosphorus atom was used. Thermodynamic parameters were obtained by following procedure.

Geometry optimization and vibrational analysis were performed for the singlet state of coordinatively-unsaturated (16-electron) complexes  $[\text{Mo}(\text{PR}_3)_2(\text{CO})_3]$  (R = Me, iPr, and Cy), H<sub>2</sub>-adduct of each complex  $[\text{Mo}(\eta^2\text{-H}_2)(\text{PR}_3)_2(\text{CO})_3]$  and free H<sub>2</sub> molecule. For 16-electron complexes, initial structures were made in the Gauss View 6.1<sup>S2</sup> by adding two trialkylphosphine PR<sub>3</sub> and three carbonyl ligands to Oh symmetric Mo atom. For H<sub>2</sub>-adduct, initial structures were made by adding a H<sub>2</sub> molecule to the initial structure of 16-electron complexes.

Standard molar Gibbs free energy change  $\Delta G^\circ$ , standard molar enthalpy change  $\Delta H^\circ$  and standard molar entropy change  $\Delta S^\circ$  of adsorption were calculated by following equation

$$\Delta E(T) = E_{M-H_2}(T) - E_{H_2}(T) - E_M(T)$$

where the subscript M- $H_2$ ,  $H_2$  and M represent  $H_2$ -adduct, free  $H_2$  molecule and 16-electron complexes, respectively.

## V. Syntheses

### Synthesis of $[\text{Mo}(\text{cht})(\text{CO})_3]$ (**Mo-cht**)<sup>S3</sup>

Nitrogen-purged 2-necked flask was charged with molybdenum hexacarbonyl  $\text{Mo}(\text{CO})_6$  (4.0 g, 15.15 mmol), 1,3,5-Cycloheptatriene (9.0 ml, 86.74 mmol) and 40 ml of  $\text{N}_2$ -saturated heptane. The white suspension was refluxed at 130 °C for 24 h and cooled down to room temperature, which gave red precipitate. The reaction mixture was filtered and washed with heptane. Residual red solid was extracted with hexane and combined with red heptane solution. Solvent was removed by rotary evaporator and resultant red solid was subject to vacuum sublimation at 40 °C to remove the unreacted  $\text{Mo}(\text{CO})_6$ , which gave analytically pure red crystalline solid of target compound.

Yield: 86 %

$^1\text{H NMR}(\text{CDCl}_3, 500 \text{ MHz}) \delta = 2.467 (1\text{H}), 3.027 (1\text{H}), 3.607 (2\text{H}), 4.927 (2\text{H}), 6.071 (2\text{H})$

IR (KBr):  $\nu(\text{CO}) = 2039, 1841(\text{br}) \text{ cm}^{-1}$

Elemental analysis: Calculated for  $\text{MoC}_{10}\text{H}_{8}\text{O}_3$  C: 44.141 H: 2.963 N: 0.000

Found C: 43.761 H: 2.963 N: 0.000

### Synthesis of $[\text{Mo}(\text{PCy}_3)_2(\text{CO})_3]$ (**1**)<sup>24</sup>

In the argon-filled glove box, 10 ml vial was charged with **Mo-cht** (326 mg, 1.2 mmol) and tricyclohexylphosphine  $\text{PCy}_3$  (688 mg, 2.45 mmol). 8.0 ml of diethyl ether  $\text{Et}_2\text{O}$  was added to this solid mixture and stirred at room temperature for 1 day. The resulting brown purple precipitate was filtered off and washed with  $\text{Et}_2\text{O}$  and dried at argon atmosphere. The product was identified by KBr-IR and elemental analysis. Although the small amount of  $[\text{Mo}(\text{PCy}_3)_2(\text{CO})_4]$  byproduct was detected by IR spectrum, the product was used for adsorption measurement without further purification because this 18-electron complex does not affect the thermodynamic parameters of adsorption.

Yield: 65 %

IR (KBr):  $\nu(\text{CO}) = 1952, 1834, 1796 \text{ cm}^{-1}$  ( $[\text{Mo}(\text{PCy}_3)_2(\text{CO})_4]$ :  $1863 \text{ cm}^{-1}$ )

Elemental analysis: Calculated for  $\text{MoC}_{39}\text{H}_{66}\text{P}_2\text{O}_3$  C: 63.230 H: 8.980 N: 0.000

Found C: 62.820 H: 8.806 N: 0.000

### Synthesis of $[\text{Mo}(\text{PCy}_3)_2(\text{CO})_3(\text{N}_2)]$ <sup>24</sup>

$\text{N}_2$ -purged 2-necked flask was charged with **Mo-cht** (272 mg, 1.0 mmol),  $\text{PCy}_3$  (574 mg, 2.05 mmol) and 4.0 ml of  $\text{N}_2$ -saturated toluene. The reaction mixture was stirred at room temperature for 4 h, and then, 10 ml of  $\text{N}_2$ -saturated heptane was added and further stirred for 45 min. The resulting yellow brown suspension was filtered and residual yellow solid was washed with heptane/toluene = 3/1. The product was identified by ATR-IR and elemental analysis. The product was

used for adsorption measurement without further purification.

Yield: 65 %

IR (ATR):  $\nu(\text{CO}) = 1956, 1835 \text{ cm}^{-1}$ ,  $\nu(\text{N} \equiv \text{N}) = 2153 \text{ cm}^{-1}$

Elemental analysis: Calculated for  $\text{MoC}_{39}\text{H}_{66}\text{P}_2\text{O}_3\text{N}_2$  C: 60.925 H: 8.652 N: 3.644

Found C: 61.675 H: 8.457 N: 3.076

### Synthesis of $[\text{Mo}(\text{PCy}_3)_2(\text{CO})_3]$ (2) from $[\text{Mo}(\text{PCy}_3)_2(\text{CO})_3(\text{N}_2)]$

Freshly synthesized  $[\text{Mo}(\text{PCy}_3)_2(\text{CO})_3(\text{N}_2)]$  (553.6 mg) was loaded into a glass tube for adsorption measurement. First, sample space was evacuated by rotary oil pump at room temperature and turbo-molecular pump was also used after the pressure reached 3.0 kPa. Heating was initiated after the pressure reached 20 kPa and temperature was raised to 80 °C with the rate of 5 °C/min. As soon as the temperature reached 80 °C, evolution of  $\text{N}_2$  gas was detected as the increase of pressure and the color of the sample changed from yellow to purple, which indicates the formation of five-coordinate complex  $[\text{Mo}(\text{PCy}_3)_2(\text{CO})_3]$ . This color change is consistent with the result of TD-DFT calculation (Fig. S14). The weight of the sample was measured again after the adsorption measurement and it was determined to be 499.6 mg. Removal of  $\text{N}_2$ -ligand and formation of the target compound were confirmed by IR measurement.

IR (KBr):  $\nu(\text{CO}) = 1953, 1922, 1837, 1798 \text{ cm}^{-1}$

Elemental analysis: Calculated for  $\text{MoC}_{39}\text{H}_{66}\text{P}_2\text{O}_3\text{N}_2$  C: 63.226 H: 8.980 N: 0.000

Found C: 61.650 H: 8.420 N: 0.000

## VI. Thermal transpiration correction

In our measurements, we used the correction of thermal transpiration using the following empirical formula.

$$\frac{P_2}{P_1} = \frac{AX^2 + BX + C\sqrt{X} + \sqrt{(T_2/T_1)}}{AX^2 + BX + C\sqrt{X} + 1}$$

$$A = 1.4 \times 10^4 \exp\left(\frac{1.17 \times D \times 10}{T}\right) \times (T)^{-2}$$

$$B = 5.6 \exp\left(\frac{1.40 \times D \times 10}{T}\right) \times (T)^{-1}$$

$$C = ((1.10 \times 10/D) - 14) \times (T)^{-0.5}$$

$$T = \frac{T_1 + T_2}{2}$$

Where  $P_1$  is pressure in the sample cell,  $P_2$  is pressure in the manifold,  $T_1$  is the temperature in the sample cell,  $T_2$  is the temperature in the manifold,  $d$  is the inner diameter of the sample cell (9 mm),  $D$  is the diameter of the hydrogen molecule (0.269 nm).

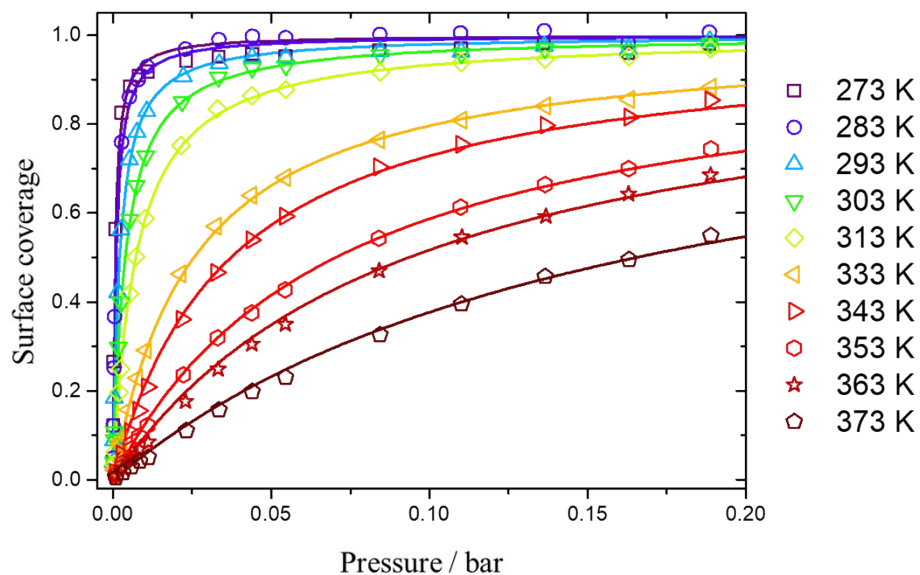

Fig. S1 Variable-temperature H<sub>2</sub> adsorption isotherms of **2** at 273-373 K. Plots represent data and lines represent the fitting by Langmuir adsorption isotherm.

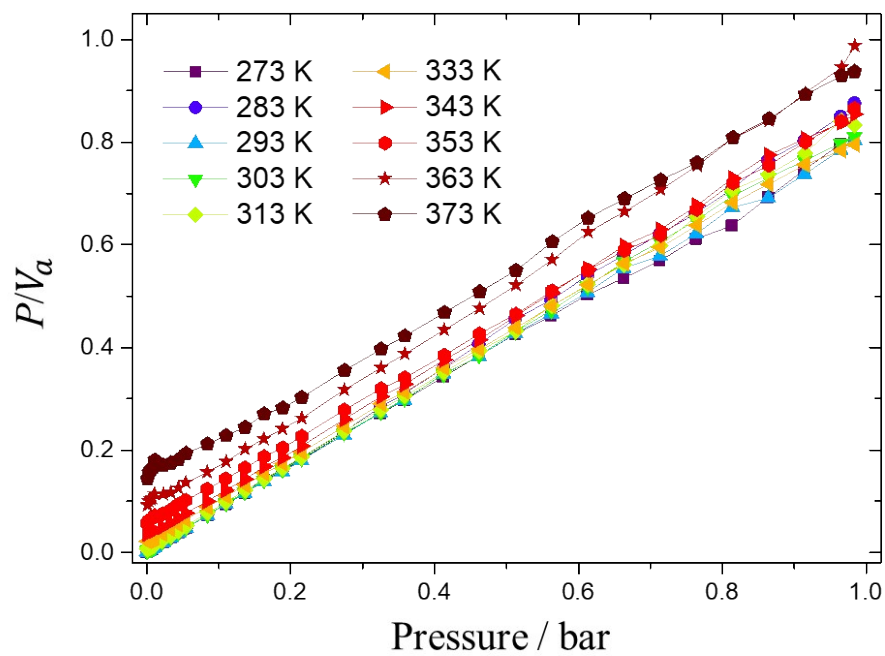

Fig. S2 Langmuir plots of **2** at 273-373 K. The lines are visual aid.

Table S1 Fitting parameters of **2** obtained from the Langmuir analysis of H<sub>2</sub> adsorption isotherms.

| Temperature (K) | $K$     | $R^2$  | $V_m$ (cm <sup>3</sup> (STP)g <sup>-1</sup> ) |
|-----------------|---------|--------|-----------------------------------------------|
| 273             | 1502.60 | 0.9901 | 1.20                                          |
| 283             | 1015.88 | 0.9970 | 1.15                                          |
| 293             | 465.76  | 0.9978 | 1.21                                          |
| 303             | 254.86  | 0.9991 | 1.20                                          |
| 313             | 137.11  | 0.9991 | 1.19                                          |
| 333             | 38.57   | 0.9991 | 1.23                                          |
| 343             | 26.47   | 0.9987 | 1.19                                          |
| 353             | 14.02   | 0.9993 | 1.24                                          |
| 363             | 10.56   | 0.9978 | 1.14                                          |
| 373             | 5.97    | 0.9990 | 1.22                                          |

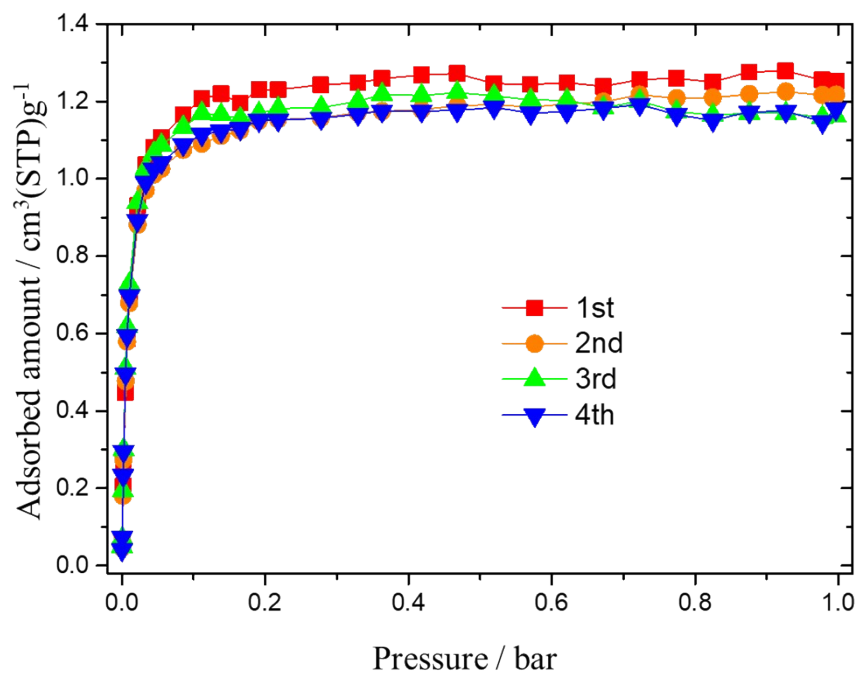

Fig. S3 Repetition of the H<sub>2</sub> adsorption isotherms of **2** at 313 K. The lines are visual aid.

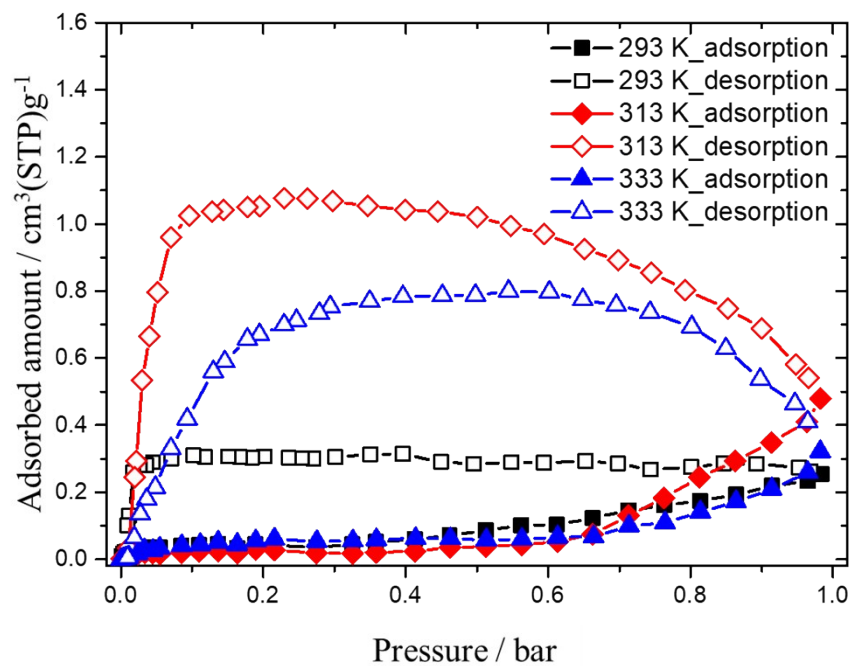

Fig. S4 Variable-temperature H<sub>2</sub> adsorption isotherms of **1** at 313-333 K. Plots represent data and lines are visual aid.

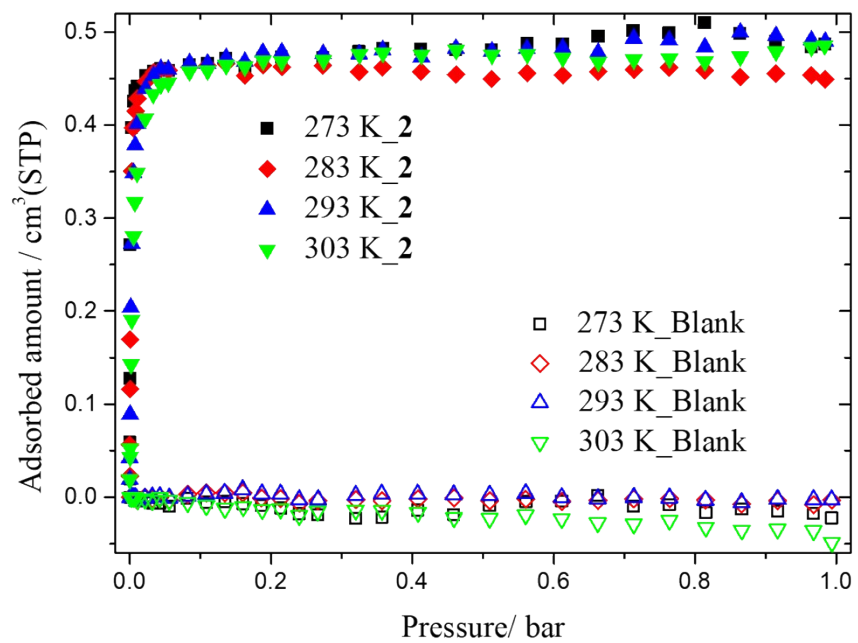

Fig. S5 H<sub>2</sub> uptake to the sample bottle with powder sample of **2** (499.6 mg) and empty bottle (blank).



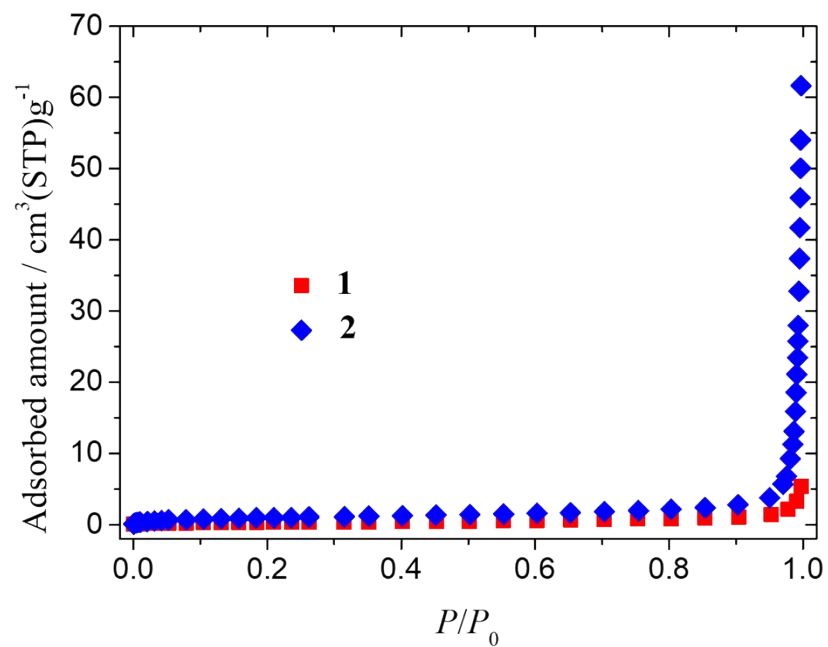

Fig. S6 Comparison of N<sub>2</sub> ad/desorption isotherms of **1** and **2** at 77 K.

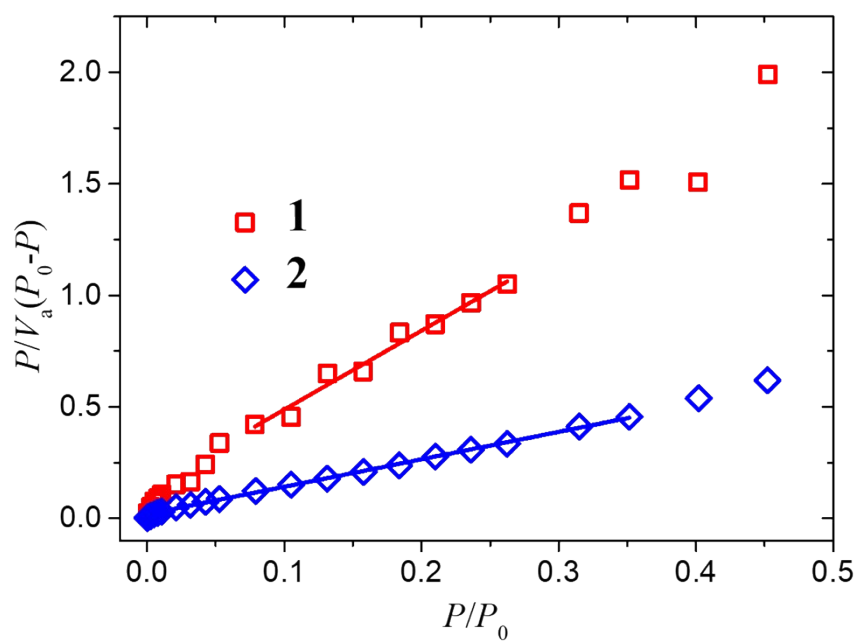

Fig. S7 BET plot of **1** and **2**. Lines represent the fitting by BET method.

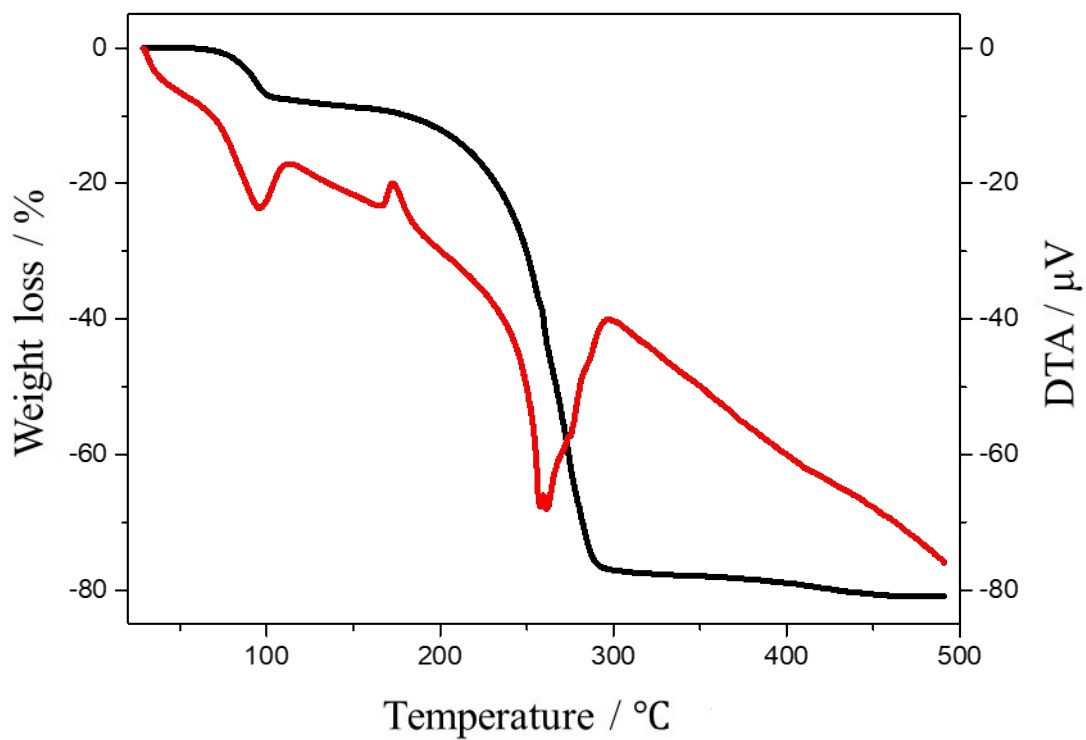

Fig. S8 TGA (black line) and DTA (red line) analysis of  $[\text{Mo}(\text{PCy}_3)_2(\text{CO})_3(\text{N}_2)]$ .

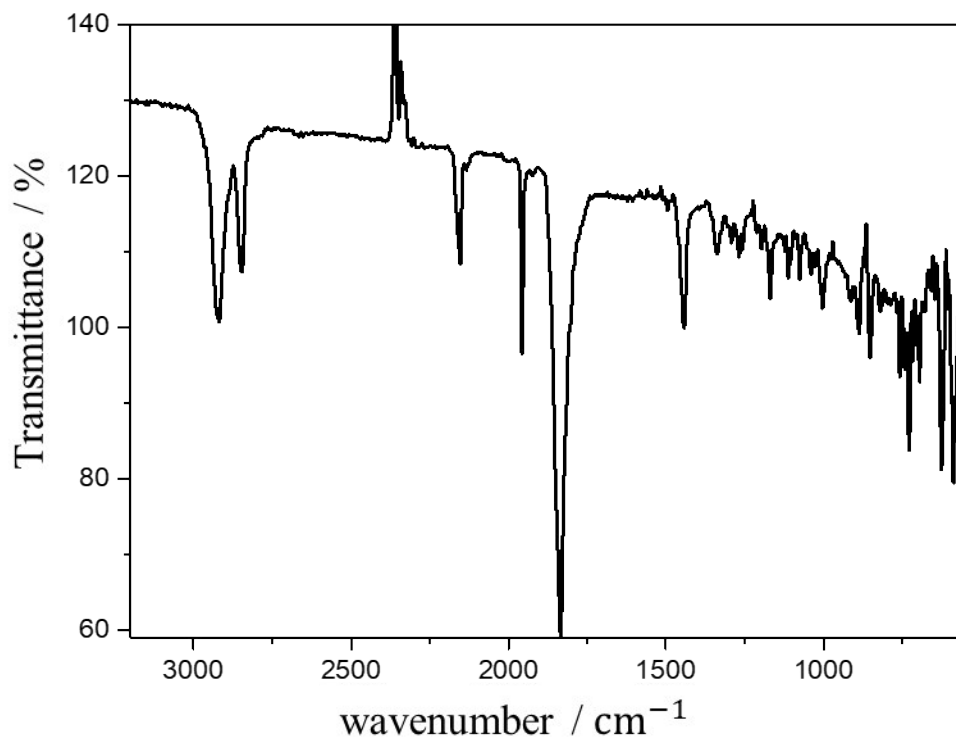

Fig. S9 FT-IR spectrum of  $[\text{Mo}(\text{PCy}_3)_2(\text{CO})_3(\text{N}_2)]$  (ATR method).

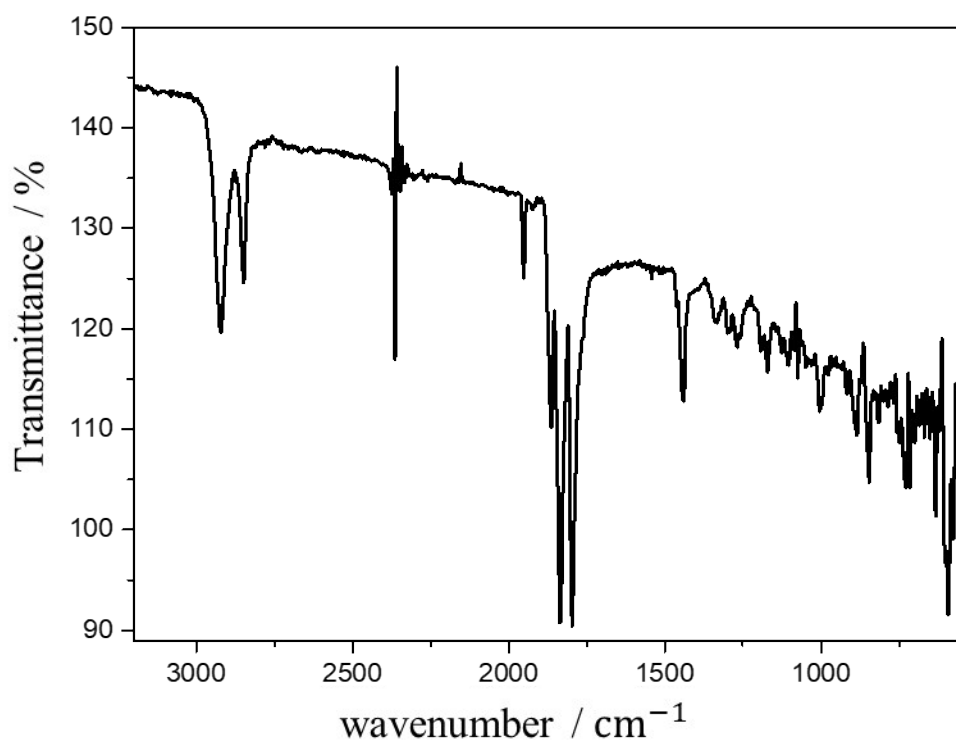

Fig. S10 FT-IR spectrum of **1** (KBr pellet).

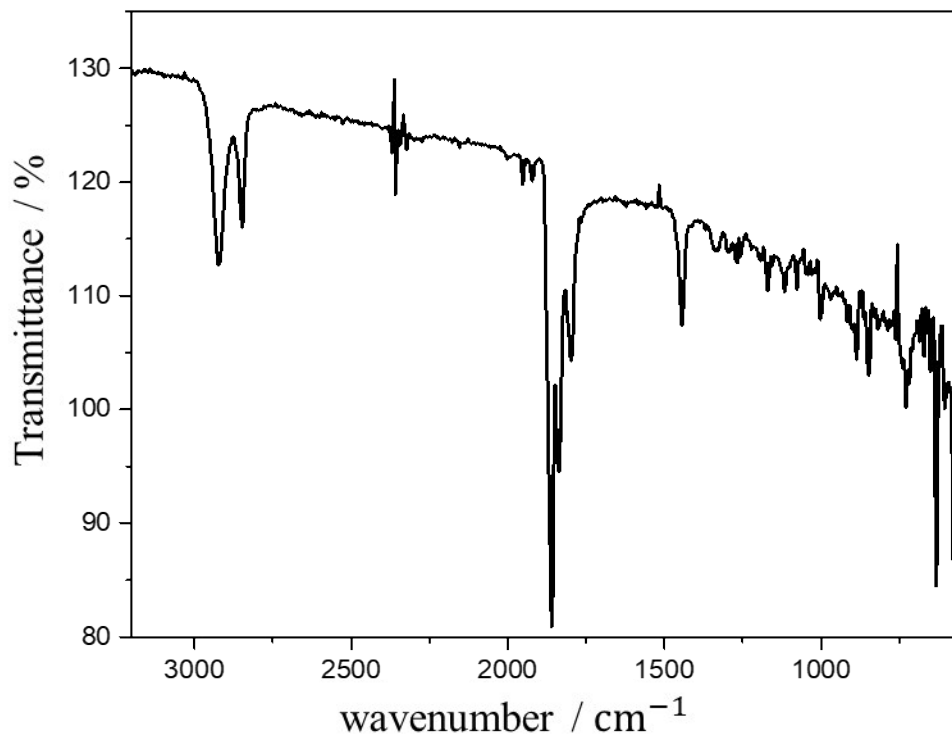

Fig. S11 FT-IR spectrum of **2** (KBr pellet).

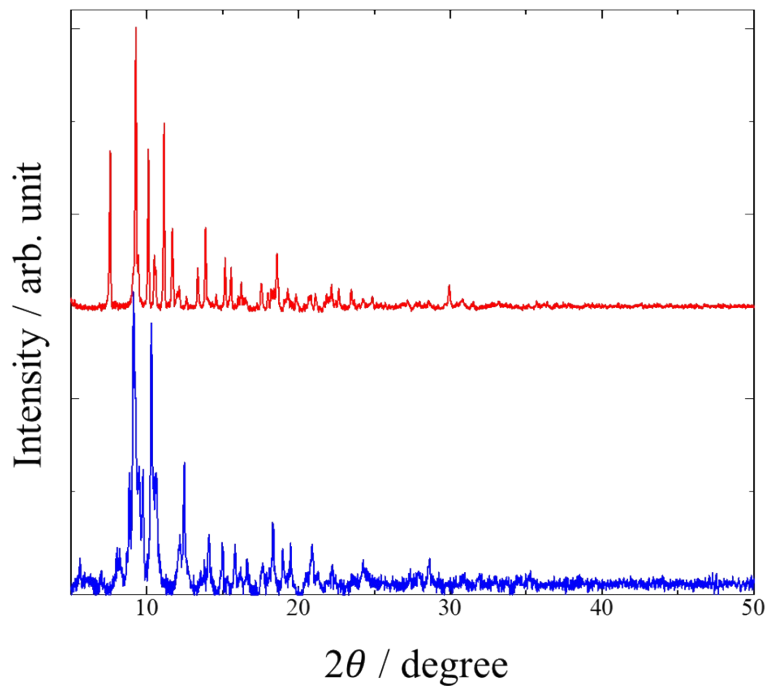

Fig. S12 PXRD pattern of **1** (red) and **2** (blue).

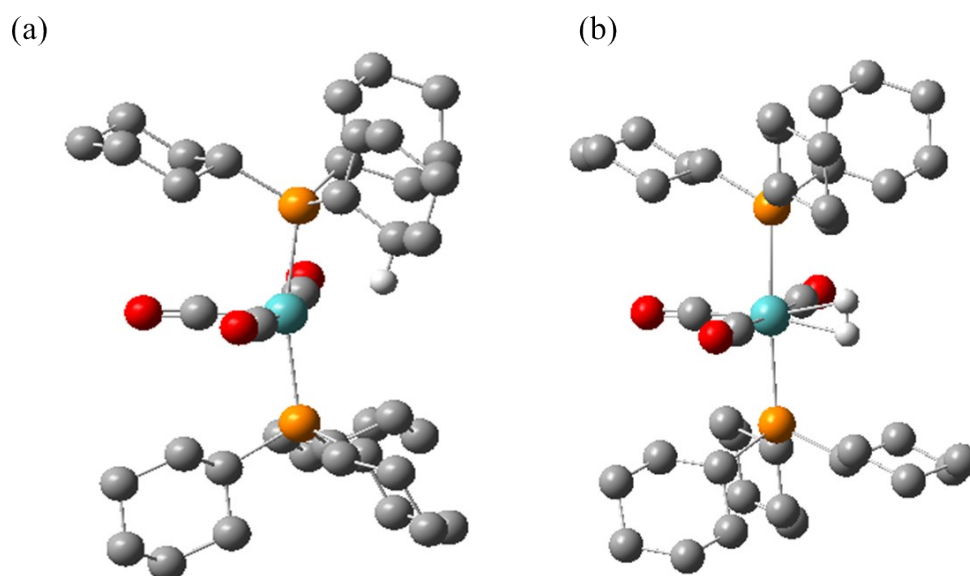

Fig. S13 Optimized structure of (a) Mo-PCy<sub>3</sub> and (b) Mo-PCy<sub>3</sub>-H<sub>2</sub>. Hydrogen atoms of cyclohexyl groups without the agostic interaction are omitted for clarity.

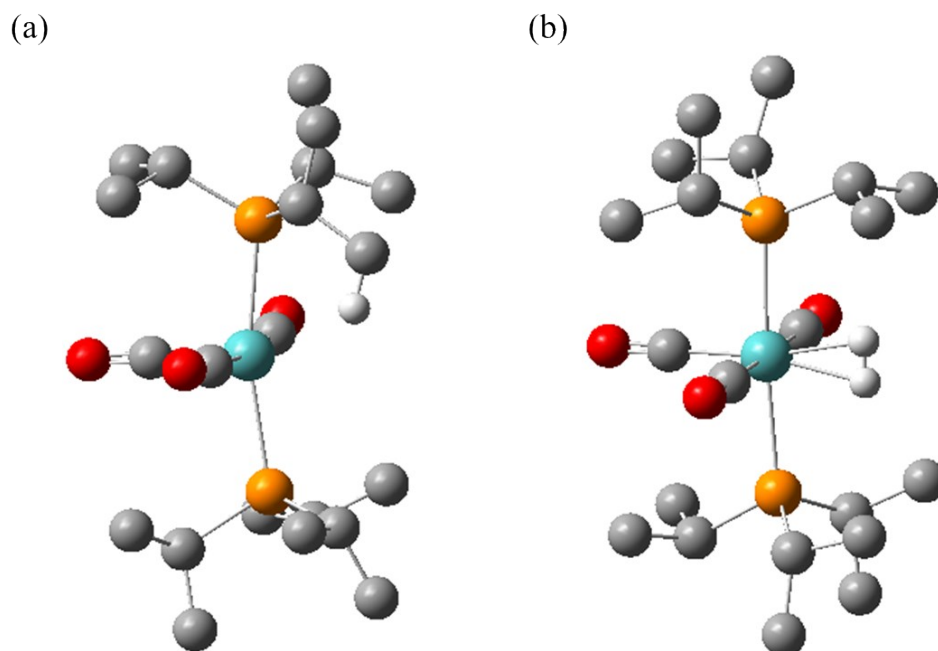

Fig. S14 Optimized structure of (a) Mo-iPr<sub>3</sub> and (b) Mo-PiPr<sub>3</sub>-H<sub>2</sub>. Hydrogen atoms of isopropyl groups without the agostic interaction are omitted for clarity.

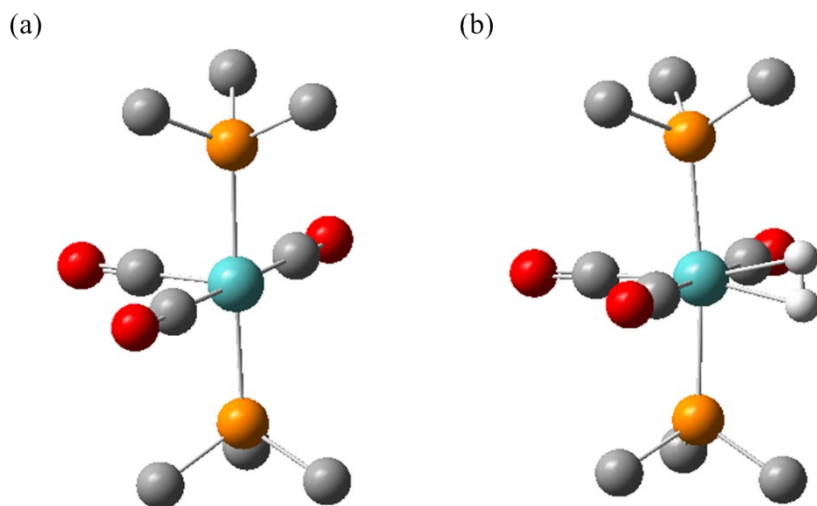

Fig. S15 Optimized structure of (a) Mo-PMe<sub>3</sub> and (b) Mo-PMe<sub>3</sub>-H<sub>2</sub>. Hydrogen atoms of methyl groups are omitted for clarity.

Table S2 Thermodynamic parameters of dihydrogen complex formation.

|                      | $\Delta G^\circ / \text{kJ/mol}$ | $\Delta H^\circ / \text{kJ/mol}$ | $\Delta S^\circ / \text{kJ/mol}$ |
|----------------------|----------------------------------|----------------------------------|----------------------------------|
| Mo-PCy <sub>3</sub>  | +9.50                            | -27.04                           | -122.57                          |
| Mo-PiPr <sub>3</sub> | +2.71                            | -28.94                           | -106.04                          |
| Mo-PMe <sub>3</sub>  | -4.46                            | -37.69                           | -111.33                          |

Table S3 Enthalpy and free energy of Mo-PR<sub>3</sub> and Mo-PR<sub>3</sub>-H<sub>2</sub>.

|                                      | Enthalpy / Hartree | Free energy / Hartree |
|--------------------------------------|--------------------|-----------------------|
| Mo-PCy <sub>3</sub>                  | -1830.889032       | -1831.027317          |
| Mo-PCy <sub>3</sub> -H <sub>2</sub>  | -1832.060288       | -1832.199434          |
| Mo-PiPr <sub>3</sub>                 | -1131.009782       | -1131.121564          |
| Mo-PiPr <sub>3</sub> -H <sub>2</sub> | -1132.181760       | -1132.296283          |
| Mo-PMe <sub>3</sub>                  | -659.727861        | -659.808648           |
| Mo-PMe <sub>3</sub> -H <sub>2</sub>  | -660.903172        | -660.986098           |

Table S4 Frequency of carbonyl and dihydrogen ligand in Mo-PR<sub>3</sub> and Mo-PR<sub>3</sub>-H<sub>2</sub>.

|                                      | $\nu_1(\text{C}\equiv\text{O}) / \text{cm}^{-1}$ | $\nu_2(\text{C}\equiv\text{O}) / \text{cm}^{-1}$ | $\nu_3(\text{C}\equiv\text{O}) / \text{cm}^{-1}$ | $\nu(\text{H-H}) / \text{cm}^{-1}$ |
|--------------------------------------|--------------------------------------------------|--------------------------------------------------|--------------------------------------------------|------------------------------------|
| Mo-PCy <sub>3</sub>                  | 1776.01                                          | 1783.78                                          | 1890.45                                          |                                    |
| Mo-PCy <sub>3</sub> -H <sub>2</sub>  | 1797.69                                          | 1801.10                                          | 1902.51                                          | 3552.46                            |
| Mo-PiPr <sub>3</sub>                 | 1781.02                                          | 1790.43                                          | 1895.00                                          |                                    |
| Mo-PiPr <sub>3</sub> -H <sub>2</sub> | 1802.63                                          | 1806.74                                          | 1905.93                                          | 3545.17                            |
| Mo-PMe <sub>3</sub>                  | 1796.28                                          | 1811.81                                          | 1911.28                                          |                                    |
| Mo-PMe <sub>3</sub> -H <sub>2</sub>  | 1817.28                                          | 1825.58                                          | 1917.09                                          | 3521.95                            |

Table S5 Atomic coordinates of Mo-PCy<sub>3</sub> in optimized structure.

|        |        |         |            |
|--------|--------|---------|------------|
| 1 Mo1  | 0.0273 | 0.1328  | -0.2949 Mo |
| 2 P2   | 2.6163 | 0.1467  | 0.0130 P   |
| 3 O3   | 0.4912 | -2.2788 | -2.3573 O  |
| 4 C4   | 0.2711 | -1.4264 | -1.5461 C  |
| 5 C5   | 3.6185 | 1.4387  | -1.0096 C  |
| 6 C6   | 3.1690 | 2.8922  | -0.7171 C  |
| 7 C7   | 3.9990 | 3.9084  | -1.5394 C  |
| 8 C8   | 3.9248 | 3.6083  | -3.0531 C  |
| 9 C9   | 4.3586 | 2.1556  | -3.3501 C  |
| 10 C10 | 3.5287 | 1.1386  | -2.5290 C  |
| 11 C11 | 3.4844 | -1.5221 | -0.4456 C  |
| 12 C12 | 3.0104 | -2.6938 | 0.4521 C   |
| 13 C13 | 3.4915 | -4.0509 | -0.1158 C  |
| 14 C14 | 5.0281 | -4.0776 | -0.2838 C  |
| 15 C15 | 5.5209 | -2.8838 | -1.1333 C  |
| 16 C16 | 5.0302 | -1.5298 | -0.5596 C  |
| 17 C17 | 3.0515 | 0.6046  | 1.8401 C   |
| 18 C18 | 2.1535 | -0.1444 | 2.8596 C   |
| 19 C19 | 2.3369 | 0.4339  | 4.2841 C   |
| 20 C20 | 3.8200 | 0.4028  | 4.7213 C   |
| 21 C21 | 4.7268 | 1.1115  | 3.6887 C   |
| 22 C22 | 4.5363 | 0.5205  | 2.2691 C   |
| 23 H23 | 4.6684 | 1.3331  | -0.6940 H  |
| 24 H24 | 2.1074 | 3.0027  | -0.9735 H  |
| 25 H25 | 3.2670 | 3.1262  | 0.3516 H   |
| 26 H26 | 3.6347 | 4.9252  | -1.3352 H  |
| 27 H27 | 5.0509 | 3.8735  | -1.2116 H  |
| 28 H28 | 2.8911 | 3.7540  | -3.4010 H  |
| 29 H29 | 4.5561 | 4.3147  | -3.6112 H  |
| 30 H30 | 5.4281 | 2.0374  | -3.1101 H  |
| 31 H31 | 4.2455 | 1.9373  | -4.4214 H  |
| 32 H32 | 2.4800 | 1.1914  | -2.8474 H  |
| 33 H33 | 3.8799 | 0.1216  | -2.7489 H  |
| 34 H34 | 3.0822 | -1.7092 | -1.4528 H  |
| 35 H35 | 1.9145 | -2.6946 | 0.5369 H   |



|        |         |         |           |
|--------|---------|---------|-----------|
| 36 H36 | 3.4162  | -2.5702 | 1.4675 H  |
| 37 H37 | 3.1688  | -4.8671 | 0.5467 H  |
| 38 H38 | 3.0117  | -4.2213 | -1.0914 H |
| 39 H39 | 5.5028  | -4.0358 | 0.7099 H  |
| 40 H40 | 5.3414  | -5.0246 | -0.7458 H |
| 41 H41 | 5.1495  | -2.9945 | -2.1642 H |
| 42 H42 | 6.6192  | -2.8858 | -1.1883 H |
| 43 H43 | 5.4854  | -1.3756 | 0.4274 H  |
| 44 H44 | 5.3823  | -0.7162 | -1.2054 H |
| 45 H45 | 2.7552  | 1.6643  | 1.8793 H  |
| 46 H46 | 2.4049  | -1.2143 | 2.8708 H  |
| 47 H47 | 1.0961  | -0.0614 | 2.5638 H  |
| 48 H48 | 1.9736  | 1.4730  | 4.2992 H  |
| 49 H49 | 1.7203  | -0.1307 | 4.9983 H  |
| 50 H50 | 4.1450  | -0.6446 | 4.8291 H  |
| 51 H51 | 3.9315  | 0.8729  | 5.7086 H  |
| 52 H52 | 5.7811  | 1.0257  | 3.9888 H  |
| 53 H53 | 4.4862  | 2.1860  | 3.6696 H  |
| 54 H54 | 5.1818  | 1.0517  | 1.5566 H  |
| 55 H55 | 4.8620  | -0.5296 | 2.2800 H  |
| 56 P56 | -2.5628 | -0.2009 | -0.0601 P |
| 57 O57 | -0.1538 | 1.8899  | -2.8567 O |
| 58 O58 | 0.0331  | 2.9120  | 1.3096 O  |
| 59 C59 | -0.0744 | 1.2050  | -1.8635 C |
| 60 C60 | -0.0087 | 1.8502  | 0.7590 C  |
| 61 C61 | -3.2889 | -1.8209 | -0.8300 C |
| 62 C62 | -3.2175 | -1.8263 | -2.3783 C |
| 63 C63 | -3.7933 | -3.1395 | -2.9644 C |
| 64 C64 | -3.0954 | -4.3846 | -2.3741 C |
| 65 C65 | -3.1794 | -4.3819 | -0.8316 C |
| 66 C66 | -2.5961 | -3.0759 | -0.2387 C |
| 67 C67 | -3.1051 | -0.3719 | 1.8061 C  |
| 68 C68 | -3.0253 | 0.9718  | 2.5763 C  |
| 69 C69 | -3.2019 | 0.7529  | 4.0982 C  |
| 70 C70 | -4.5310 | 0.0318  | 4.4153 C  |
| 71 C71 | -4.6513 | -1.2868 | 3.6195 C  |

|          |         |         |           |
|----------|---------|---------|-----------|
| 72 C72   | -4.4640 | -1.0624 | 2.0972 C  |
| 73 C73   | -3.6442 | 1.1594  | -0.9175 C |
| 74 C74   | -3.1949 | 2.6099  | -0.6089 C |
| 75 C75   | -3.9455 | 3.6161  | -1.5153 C |
| 76 C76   | -5.4788 | 3.4757  | -1.3834 C |
| 77 C77   | -5.9302 | 2.0215  | -1.6484 C |
| 78 C78   | -5.1770 | 1.0188  | -0.7382 C |
| 79 H79   | -4.3506 | -1.8508 | -0.5444 H |
| 80 H80   | -2.1761 | -1.7115 | -2.7043 H |
| 81 H81   | -3.7773 | -0.9770 | -2.7917 H |
| 82 H82   | -3.6862 | -3.1271 | -4.0583 H |
| 83 H83   | -4.8730 | -3.1929 | -2.7494 H |
| 84 H84   | -2.0383 | -4.3871 | -2.6803 H |
| 85 H85   | -3.5502 | -5.3009 | -2.7770 H |
| 86 H86   | -4.2325 | -4.4863 | -0.5237 H |
| 87 H87   | -2.6391 | -5.2461 | -0.4188 H |
| 88 H88   | -1.5212 | -3.0349 | -0.4598 H |
| 89 H89   | -2.6964 | -3.0951 | 0.8557 H  |
| 90 H90   | -2.3143 | -1.0270 | 2.2112 H  |
| 91 H91   | -2.0742 | 1.4785  | 2.3814 H  |
| 92 H92   | -3.8232 | 1.6412  | 2.2234 H  |
| 93 H93   | -3.1608 | 1.7213  | 4.6167 H  |
| 94 H94   | -2.3603 | 0.1521  | 4.4790 H  |
| 95 H95   | -5.3725 | 0.6925  | 4.1523 H  |
| 96 H96   | -4.6089 | -0.1679 | 5.4936 H  |
| 97 H97   | -3.8871 | -1.9963 | 3.9756 H  |
| 98 H98   | -5.6291 | -1.7548 | 3.8047 H  |
| 99 H99   | -5.2869 | -0.4385 | 1.7232 H  |
| 100 H100 | -4.5375 | -2.0289 | 1.5858 H  |
| 101 H101 | -3.4101 | 0.9817  | -1.9786 H |
| 102 H102 | -3.3954 | 2.8564  | 0.4428 H  |
| 103 H103 | -2.1172 | 2.7123  | -0.7647 H |
| 104 H104 | -3.6500 | 3.4453  | -2.5620 H |
| 105 H105 | -3.6342 | 4.6392  | -1.2616 H |
| 106 H106 | -5.7850 | 3.7701  | -0.3665 H |
| 107 H107 | -5.9845 | 4.1610  | -2.0785 H |

|          |         |         |           |
|----------|---------|---------|-----------|
| 108 H108 | -7.0141 | 1.9235  | -1.4897 H |
| 109 H109 | -5.7375 | 1.7677  | -2.7028 H |
| 110 H110 | -5.5125 | -0.0024 | -0.9631 H |
| 111 H111 | -5.4455 | 1.2250  | 0.3083 H  |

Table S6 Atomic coordinates of Mo-PCy<sub>3</sub>-H<sub>2</sub> in optimized structure.

|        |         |         |            |
|--------|---------|---------|------------|
| 1 Mo1  | -0.0037 | -0.0520 | -0.0152 Mo |
| 2 P2   | -2.6334 | -0.1304 | 0.0192 P   |
| 3 O3   | 0.0043  | 0.1041  | 3.1930 O   |
| 4 C4   | 0.0026  | 0.0710  | 1.9983 C   |
| 5 C5   | -3.4396 | -1.8789 | 0.1972 C   |
| 6 C6   | -3.0730 | -2.5544 | 1.5432 C   |
| 7 C7   | -3.7383 | -3.9470 | 1.6726 C   |
| 8 C8   | -3.3816 | -4.8593 | 0.4783 C   |
| 9 C9   | -3.7622 | -4.1862 | -0.8590 C  |
| 10 C10 | -3.0946 | -2.7964 | -1.0042 C  |
| 11 C11 | -3.4424 | 0.5032  | -1.6308 C  |
| 12 C12 | -3.1116 | 1.9843  | -1.9441 C  |
| 13 C13 | -3.5257 | 2.3486  | -3.3909 C  |
| 14 C14 | -5.0238 | 2.0624  | -3.6401 C  |
| 15 C15 | -5.3798 | 0.6017  | -3.2827 C  |
| 16 C16 | -4.9586 | 0.2487  | -1.8333 C  |
| 17 C17 | -3.4104 | 0.8034  | 1.5357 C   |
| 18 C18 | -2.9259 | 2.2681  | 1.6821 C   |
| 19 C19 | -3.3576 | 2.8572  | 3.0480 C   |
| 20 C20 | -4.8866 | 2.7642  | 3.2521 C   |
| 21 C21 | -5.3879 | 1.3149  | 3.0611 C   |
| 22 C22 | -4.9511 | 0.7396  | 1.6901 C   |
| 23 H23 | -4.5269 | -1.7115 | 0.1915 H   |
| 24 H24 | -1.9848 | -2.6699 | 1.6154 H   |
| 25 H25 | -3.3870 | -1.9264 | 2.3882 H   |
| 26 H26 | -3.4227 | -4.4144 | 2.6163 H   |
| 27 H27 | -4.8329 | -3.8275 | 1.7252 H   |
| 28 H28 | -2.3002 | -5.0612 | 0.4867 H   |
| 29 H29 | -3.8935 | -5.8276 | 0.5749 H   |
| 30 H30 | -4.8579 | -4.0757 | -0.9123 H  |

|        |         |         |           |
|--------|---------|---------|-----------|
| 31 H31 | -3.4642 | -4.8232 | -1.7040 H |
| 32 H32 | -2.0083 | -2.9282 | -1.0689 H |
| 33 H33 | -3.4186 | -2.3361 | -1.9474 H |
| 34 H34 | -2.9057 | -0.1069 | -2.3741 H |
| 35 H35 | -2.0392 | 2.1755  | -1.8118 H |
| 36 H36 | -3.6495 | 2.6416  | -1.2448 H |
| 37 H37 | -3.3049 | 3.4084  | -3.5841 H |
| 38 H38 | -2.9180 | 1.7615  | -4.0964 H |
| 39 H39 | -5.6313 | 2.7446  | -3.0235 H |
| 40 H40 | -5.2800 | 2.2690  | -4.6890 H |
| 41 H41 | -4.8696 | -0.0783 | -3.9829 H |
| 42 H42 | -6.4597 | 0.4335  | -3.4048 H |
| 43 H43 | -5.5404 | 0.8662  | -1.1358 H |
| 44 H44 | -5.2165 | -0.7973 | -1.6279 H |
| 45 H45 | -2.9697 | 0.2424  | 2.3749 H  |
| 46 H46 | -3.3485 | 2.8867  | 0.8769 H  |
| 47 H47 | -1.8343 | 2.3193  | 1.5938 H  |
| 48 H48 | -2.8465 | 2.3063  | 3.8525 H  |
| 49 H49 | -3.0286 | 3.9040  | 3.1198 H  |
| 50 H50 | -5.3911 | 3.4203  | 2.5244 H  |
| 51 H51 | -5.1584 | 3.1307  | 4.2522 H  |
| 52 H52 | -6.4837 | 1.2778  | 3.1459 H  |
| 53 H53 | -4.9835 | 0.6806  | 3.8655 H  |
| 54 H54 | -5.3181 | -0.2900 | 1.5930 H  |
| 55 H55 | -5.4286 | 1.3287  | 0.8945 H  |
| 56 P56 | 2.6051  | 0.2446  | -0.0344 P |
| 57 O57 | -0.0567 | -0.3770 | -3.2114 O |
| 58 O58 | 0.2824  | -3.1759 | 0.2287 O  |
| 59 C59 | -0.0319 | -0.2341 | -2.0253 C |
| 60 C60 | 0.1689  | -1.9821 | 0.1362 C  |
| 61 C61 | 3.2250  | 2.0803  | -0.1017 C |
| 62 C62 | 2.8408  | 2.7950  | -1.4215 C |
| 63 C63 | 3.3714  | 4.2499  | -1.4518 C |
| 64 C64 | 2.8952  | 5.0590  | -0.2249 C |
| 65 C65 | 3.2785  | 4.3455  | 1.0907 C  |
| 66 C66 | 2.7412  | 2.8940  | 1.1257 C  |

|          |        |         |           |
|----------|--------|---------|-----------|
| 67 C67   | 3.4764 | -0.3951 | 1.5827 C  |
| 68 C68   | 3.4070 | -1.9365 | 1.7322 C  |
| 69 C69   | 3.8452 | -2.3702 | 3.1518 C  |
| 70 C70   | 5.2645 | -1.8602 | 3.4875 C  |
| 71 C71   | 5.3689 | -0.3314 | 3.2874 C  |
| 72 C72   | 4.9206 | 0.0953  | 1.8657 C  |
| 73 C73   | 3.4858 | -0.5079 | -1.5901 C |
| 74 C74   | 3.1286 | -1.9931 | -1.8529 C |
| 75 C75   | 3.6436 | -2.4379 | -3.2434 C |
| 76 C76   | 5.1648 | -2.2079 | -3.3911 C |
| 77 C77   | 5.5416 | -0.7420 | -3.0780 C |
| 78 C78   | 5.0193 | -0.3065 | -1.6853 C |
| 79 H79   | 4.3226 | 2.0308  | -0.0602 H |
| 80 H80   | 1.7463 | 2.8091  | -1.5338 H |
| 81 H81   | 3.2381 | 2.2492  | -2.2873 H |
| 82 H82   | 3.0470 | 4.7399  | -2.3810 H |
| 83 H83   | 4.4728 | 4.2335  | -1.4685 H |
| 84 H84   | 1.8004 | 5.1764  | -0.2688 H |
| 85 H85   | 3.3246 | 6.0706  | -0.2480 H |
| 86 H86   | 4.3757 | 4.3310  | 1.1890 H  |
| 87 H87   | 2.8893 | 4.9032  | 1.9544 H  |
| 88 H88   | 1.6419 | 2.9208  | 1.1419 H  |
| 89 H89   | 3.0537 | 2.4101  | 2.0601 H  |
| 90 H90   | 2.8249 | 0.0326  | 2.3605 H  |
| 91 H91   | 2.3968 | -2.3044 | 1.5289 H  |
| 92 H92   | 4.0768 | -2.4080 | 0.9979 H  |
| 93 H93   | 3.8064 | -3.4660 | 3.2297 H  |
| 94 H94   | 3.1286 | -1.9728 | 3.8873 H  |
| 95 H95   | 5.9946 | -2.3621 | 2.8321 H  |
| 96 H96   | 5.5304 | -2.1250 | 4.5209 H  |
| 97 H97   | 4.7348 | 0.1755  | 4.0320 H  |
| 98 H98   | 6.4007 | 0.0060  | 3.4650 H  |
| 99 H99   | 5.6147 | -0.3331 | 1.1302 H  |
| 100 H100 | 4.9978 | 1.1861  | 1.7821 H  |
| 101 H101 | 3.0206 | 0.0737  | -2.4020 H |
| 102 H102 | 3.5812 | -2.6323 | -1.0826 H |

|          |         |         |           |
|----------|---------|---------|-----------|
| 103 H103 | 2.0466  | -2.1439 | -1.7952 H |
| 104 H104 | 3.1095  | -1.8724 | -4.0228 H |
| 105 H105 | 3.4036  | -3.4990 | -3.4008 H |
| 106 H106 | 5.7016  | -2.8748 | -2.6973 H |
| 107 H107 | 5.4932  | -2.4742 | -4.4060 H |
| 108 H108 | 6.6329  | -0.6118 | -3.1216 H |
| 109 H109 | 5.1103  | -0.0831 | -3.8483 H |
| 110 H110 | 5.2991  | 0.7393  | -1.5013 H |
| 111 H111 | 5.5188  | -0.9142 | -0.9174 H |
| 112 H112 | 0.2258  | 1.9198  | -0.1958 H |
| 113 H113 | -0.5644 | 1.8552  | -0.1796 H |

Table S7 Atomic coordinates of Mo-PiPr<sub>3</sub> in optimized structure.

|        |         |         |            |
|--------|---------|---------|------------|
| 1 Mo1  | -0.0132 | 0.0109  | -0.1668 Mo |
| 2 P2   | -2.6015 | -0.0406 | 0.1248 P   |
| 3 O3   | -0.3766 | 3.0203  | -1.2157 O  |
| 4 C4   | -0.1949 | 1.9264  | -0.7673 C  |
| 5 C5   | -3.6326 | -0.8632 | -1.2841 C  |
| 6 C6   | -3.2148 | -2.3313 | -1.5184 C  |
| 7 C7   | -3.5168 | -0.0505 | -2.5948 C  |
| 8 C8   | -3.4270 | 1.7077  | 0.2851 C   |
| 9 C9   | -2.9287 | 2.4597  | 1.5411 C   |
| 10 C10 | -4.9688 | 1.7717  | 0.1850 C   |
| 11 C11 | -3.0701 | -1.1015 | 1.6773 C   |
| 12 C12 | -2.1644 | -0.7630 | 2.8855 C   |
| 13 C13 | -4.5587 | -1.1195 | 2.0889 C   |
| 14 H14 | -4.6779 | -0.8448 | -0.9433 H  |
| 15 H15 | -2.1672 | -2.3980 | -1.8307 H  |
| 16 H16 | -3.3478 | -2.9586 | -0.6288 H  |
| 17 H17 | -2.4868 | -0.0480 | -2.9657 H  |
| 18 H18 | -3.8419 | 0.9903  | -2.4788 H  |
| 19 H19 | -3.0129 | 2.2256  | -0.5908 H  |
| 20 H20 | -1.8375 | 2.4096  | 1.6441 H   |
| 21 H21 | -3.3831 | 2.0605  | 2.4565 H   |
| 22 H22 | -5.4588 | 1.3094  | 1.0478 H   |
| 23 H23 | -5.3519 | 1.2925  | -0.7224 H  |

|        |         |         |           |
|--------|---------|---------|-----------|
| 24 H24 | -2.7975 | -2.1124 | 1.3431 H  |
| 25 H25 | -2.3818 | 0.2296  | 3.2960 H  |
| 26 H26 | -1.1004 | -0.8006 | 2.6138 H  |
| 27 H27 | -5.2263 | -1.3257 | 1.2437 H  |
| 28 H28 | -4.8625 | -0.1685 | 2.5422 H  |
| 29 P29 | 2.5814  | 0.1514  | 0.1536 P  |
| 30 O30 | 0.1282  | -0.6992 | -3.1930 O |
| 31 O31 | -0.0894 | -3.1577 | 0.3332 O  |
| 32 C32 | 0.0636  | -0.4219 | -2.0187 C |
| 33 C33 | -0.0259 | -1.9707 | 0.1985 C  |
| 34 C34 | 3.3605  | 1.9197  | 0.0427 C  |
| 35 C35 | 3.3024  | 2.4907  | -1.3918 C |
| 36 C36 | 2.6878  | 2.8816  | 1.0490 C  |
| 37 C37 | 3.1346  | -0.4105 | 1.9406 C  |
| 38 C38 | 3.0541  | -1.9442 | 2.1270 C  |
| 39 C39 | 4.5024  | 0.1129  | 2.4421 C  |
| 40 C40 | 3.6287  | -0.8150 | -1.1634 C |
| 41 C41 | 3.1390  | -2.2615 | -1.3976 C |
| 42 C42 | 5.1592  | -0.7806 | -0.9459 C |
| 43 H43 | 4.4153  | 1.8053  | 0.3249 H  |
| 44 H44 | 2.2776  | 2.5168  | -1.7765 H |
| 45 H45 | 3.9168  | 1.9142  | -2.0932 H |
| 46 H46 | 1.6372  | 3.0513  | 0.7900 H  |
| 47 H47 | 2.7297  | 2.5085  | 2.0804 H  |
| 48 H48 | 2.3537  | 0.0421  | 2.5723 H  |
| 49 H49 | 2.1138  | -2.3659 | 1.7606 H  |
| 50 H50 | 3.8790  | -2.4496 | 1.6103 H  |
| 51 H51 | 5.3317  | -0.2638 | 1.8344 H  |
| 52 H52 | 4.5594  | 1.2060  | 2.4582 H  |
| 53 H53 | 3.3966  | -0.2485 | -2.0760 H |
| 54 H54 | 3.3266  | -2.9084 | -0.5339 H |
| 55 H55 | 2.0712  | -2.2945 | -1.6264 H |
| 56 H56 | 5.5457  | 0.2328  | -0.7855 H |
| 57 H57 | 5.4569  | -1.4026 | -0.0930 H |
| 58 H58 | 3.1960  | 3.8557  | 1.0270 H  |
| 59 H59 | 3.6831  | 3.5218  | -1.3908 H |

|        |         |         |           |
|--------|---------|---------|-----------|
| 60 H60 | 4.6622  | -0.2380 | 3.4720 H  |
| 61 H61 | 3.1390  | -2.1866 | 3.1957 H  |
| 62 H62 | -2.3237 | -1.4978 | 3.6870 H  |
| 63 H63 | -3.2057 | 3.5203  | 1.4695 H  |
| 64 H64 | -5.2812 | 2.8256  | 0.1539 H  |
| 65 H65 | -4.1488 | -0.5116 | -3.3666 H |
| 66 H66 | -3.8318 | -2.7599 | -2.3203 H |
| 67 H67 | -4.7219 | -1.9069 | 2.8387 H  |
| 68 H68 | 3.6779  | -2.6868 | -2.2561 H |
| 69 H69 | 5.6596  | -1.1875 | -1.8360 H |

Table S8 Atomic coordinates of Mo-PiPr<sub>3</sub>-H<sub>2</sub> in optimized structure.

|        |         |         |           |
|--------|---------|---------|-----------|
| 1 Mo1  | 0.0067  | 0.0274  | 0.0112 Mo |
| 2 P2   | 2.6341  | 0.0277  | -0.0105 P |
| 3 O3   | -0.0263 | 0.8697  | -3.0885 O |
| 4 C4   | -0.0119 | 0.5812  | -1.9294 C |
| 5 C5   | 3.4909  | -1.6284 | -0.5276 C |
| 6 C6   | 3.1588  | -2.0162 | -1.9857 C |
| 7 C7   | 3.1416  | -2.7731 | 0.4502 C  |
| 8 C8   | 3.4211  | 0.3360  | 1.7439 C  |
| 9 C9   | 3.0846  | 1.7344  | 2.3098 C  |
| 10 C10 | 4.9332  | 0.0478  | 1.8969 C  |
| 11 C11 | 3.4074  | 1.2687  | -1.2930 C |
| 12 C12 | 2.8479  | 2.7037  | -1.1644 C |
| 13 C13 | 4.9512  | 1.3009  | -1.3764 C |
| 14 H14 | 4.5704  | -1.4360 | -0.4618 H |
| 15 H15 | 2.0827  | -2.1516 | -2.1310 H |
| 16 H16 | 3.5134  | -1.2701 | -2.7074 H |
| 17 H17 | 2.0723  | -3.0019 | 0.4325 H  |
| 18 H18 | 3.4252  | -2.5426 | 1.4843 H  |
| 19 H19 | 2.8764  | -0.4008 | 2.3508 H  |
| 20 H20 | 2.0165  | 1.9656  | 2.2316 H  |
| 21 H21 | 3.6497  | 2.5242  | 1.7995 H  |
| 22 H22 | 5.5471  | 0.7732  | 1.3529 H  |
| 23 H23 | 5.2105  | -0.9562 | 1.5589 H  |
| 24 H24 | 3.0245  | 0.8588  | -2.2384 H |



|        |         |         |           |
|--------|---------|---------|-----------|
| 25 H25 | 3.1853  | 3.1944  | -0.2438 H |
| 26 H26 | 1.7535  | 2.7177  | -1.1845 H |
| 27 H27 | 5.3973  | 0.3022  | -1.4427 H |
| 28 H28 | 5.3893  | 1.8157  | -0.5134 H |
| 29 P29 | -2.6072 | 0.2235  | 0.0822 P  |
| 30 O30 | 0.0604  | -0.9760 | 3.0632 O  |
| 31 O31 | -0.1982 | -2.9717 | -0.9191 O |
| 32 C32 | 0.0359  | -0.5820 | 1.9357 C  |
| 33 C33 | -0.1131 | -1.8272 | -0.5615 C |
| 34 C34 | -3.2837 | 1.9777  | 0.5571 C  |
| 35 C35 | -2.9214 | 2.3683  | 2.0071 C  |
| 36 C36 | -2.8054 | 3.0557  | -0.4421 C |
| 37 C37 | -3.4714 | -0.0732 | -1.6375 C |
| 38 C38 | -3.3983 | -1.5519 | -2.0850 C |
| 39 C39 | -4.9152 | 0.4607  | -1.7954 C |
| 40 C40 | -3.4645 | -0.8846 | 1.4287 C  |
| 41 C41 | -3.0529 | -2.3722 | 1.3474 C  |
| 42 C42 | -5.0021 | -0.7562 | 1.5313 C  |
| 43 H43 | -4.3768 | 1.9073  | 0.4865 H  |
| 44 H44 | -1.8364 | 2.3538  | 2.1724 H  |
| 45 H45 | -3.3816 | 1.7015  | 2.7455 H  |
| 46 H46 | -1.7173 | 3.1863  | -0.4022 H |
| 47 H47 | -3.0711 | 2.8160  | -1.4783 H |
| 48 H48 | -2.8222 | 0.5061  | -2.3087 H |
| 49 H49 | -2.4022 | -1.9833 | -1.9556 H |
| 50 H50 | -4.1160 | -2.1718 | -1.5334 H |
| 51 H51 | -5.6233 | -0.0687 | -1.1492 H |
| 52 H52 | -5.0002 | 1.5331  | -1.5900 H |
| 53 H53 | -3.0238 | -0.4789 | 2.3508 H  |
| 54 H54 | -3.4798 | -2.8685 | 0.4694 H  |
| 55 H55 | -1.9682 | -2.4983 | 1.3122 H  |
| 56 H56 | -5.3452 | 0.2836  | 1.5858 H  |
| 57 H57 | -5.5005 | -1.2388 | 0.6824 H  |
| 58 H58 | -0.2729 | 1.9091  | 0.6056 H  |
| 59 H59 | 0.5191  | 1.8682  | 0.5768 H  |
| 60 H60 | -3.2658 | 4.0220  | -0.1931 H |

|        |         |         |           |
|--------|---------|---------|-----------|
| 61 H61 | -3.2763 | 3.3874  | 2.2149 H  |
| 62 H62 | -5.3462 | -1.2651 | 2.4430 H  |
| 63 H63 | -5.2375 | 0.3022  | -2.8347 H |
| 64 H64 | -3.6573 | -1.6195 | -3.1508 H |
| 65 H65 | -3.4232 | -2.8964 | 2.2399 H  |
| 66 H66 | 3.2024  | 3.3089  | -2.0107 H |
| 67 H67 | 5.2531  | 1.8566  | -2.2757 H |
| 68 H68 | 3.3541  | 1.7718  | 3.3744 H  |
| 69 H69 | 5.2038  | 0.1198  | 2.9603 H  |
| 70 H70 | 3.6812  | -3.6833 | 0.1531 H  |
| 71 H71 | 3.6489  | -2.9692 | -2.2291 H |

Table S9 Atomic coordinates of Mo-PMe<sub>3</sub> in optimized structure.

|        |         |         |           |
|--------|---------|---------|-----------|
| 1 Mo1  | -0.0000 | 0.0001  | 0.2078 Mo |
| 2 C2   | -0.0001 | -2.0419 | 0.1856 C  |
| 3 C3   | 0.0000  | 2.0421  | 0.1860 C  |
| 4 C4   | -0.0000 | 0.0002  | -1.7159 C |
| 5 P5   | 2.4907  | -0.0001 | 0.2436 P  |
| 6 P6   | -2.4907 | -0.0000 | 0.2435 P  |
| 7 O7   | -0.0000 | -3.2146 | 0.1309 O  |
| 8 O8   | 0.0004  | 0.0006  | -2.9019 O |
| 9 O9   | 0.0000  | 3.2147  | 0.1315 O  |
| 10 C10 | 3.3364  | -1.4349 | -0.5864 C |
| 11 H11 | 4.4331  | -1.3344 | -0.5418 H |
| 12 H12 | 3.0337  | -2.3721 | -0.0964 H |
| 13 H13 | 3.0159  | -1.4766 | -1.6378 H |
| 14 C14 | 3.3475  | 0.0003  | 1.9056 C  |
| 15 H15 | 4.4439  | -0.0007 | 1.7908 H  |
| 16 H16 | 3.0474  | 0.8942  | 2.4739 H  |
| 17 H17 | 3.0459  | -0.8922 | 2.4752 H  |
| 18 C18 | 3.3367  | 1.4341  | -0.5872 C |
| 19 H19 | 3.0329  | 2.3718  | -0.0989 H |
| 20 H20 | 4.4334  | 1.3343  | -0.5411 H |
| 21 H21 | 3.0175  | 1.4742  | -1.6391 H |
| 22 C22 | -3.3476 | -0.0004 | 1.9055 C  |
| 23 H23 | -4.4440 | -0.0009 | 1.7907 H  |

|        |         |         |           |
|--------|---------|---------|-----------|
| 24 H24 | -3.0464 | -0.8935 | 2.4744 H  |
| 25 H25 | -3.0472 | 0.8929  | 2.4744 H  |
| 26 C26 | -3.3365 | -1.4345 | -0.5871 C |
| 27 H27 | -3.0335 | -2.3719 | -0.0978 H |
| 28 H28 | -4.4332 | -1.3342 | -0.5422 H |
| 29 H29 | -3.0162 | -1.4756 | -1.6387 H |
| 30 C30 | -3.3367 | 1.4345  | -0.5867 C |
| 31 H31 | -4.4334 | 1.3344  | -0.5411 H |
| 32 H32 | -3.0333 | 2.3719  | -0.0975 H |
| 33 H33 | -3.0170 | 1.4754  | -1.6384 H |

Table S10 Atomic coordinates of Mo-PMe<sub>3</sub>-H<sub>2</sub> in optimized structure.

|        |         |         |            |
|--------|---------|---------|------------|
| 1 Mo1  | -0.0000 | 0.0001  | -0.2874 Mo |
| 2 C2   | -0.0002 | -2.0382 | -0.3074 C  |
| 3 C3   | 0.0004  | 2.0383  | -0.3078 C  |
| 4 C4   | -0.0001 | 0.0004  | 1.6826 C   |
| 5 P5   | -2.4701 | 0.0000  | -0.1528 P  |
| 6 P6   | 2.4700  | -0.0002 | -0.1528 P  |
| 7 O7   | -0.0002 | -3.1937 | -0.2961 O  |
| 8 O8   | -0.0001 | 0.0007  | 2.8455 O   |
| 9 O9   | 0.0007  | 3.1938  | -0.2967 O  |
| 10 C10 | -3.2156 | -1.4217 | 0.7504 C   |
| 11 H11 | -4.3061 | -1.3207 | 0.8353 H   |
| 12 H12 | -2.9766 | -2.3536 | 0.2236 H   |
| 13 H13 | -2.7760 | -1.4762 | 1.7540 H   |
| 14 C14 | -3.4683 | -0.0019 | -1.7046 C  |
| 15 H15 | -4.5470 | -0.0017 | -1.4965 H  |
| 16 H16 | -3.2149 | 0.8871  | -2.2964 H  |
| 17 H17 | -3.2148 | -0.8922 | -2.2942 H  |
| 18 C18 | -3.2161 | 1.4234  | 0.7474 C   |
| 19 H19 | -2.9771 | 2.3544  | 0.2188 H   |
| 20 H20 | -4.3066 | 1.3224  | 0.8321 H   |
| 21 H21 | -2.7768 | 1.4799  | 1.7510 H   |
| 22 C22 | 3.4683  | -0.0004 | -1.7046 C  |
| 23 H23 | 4.5470  | -0.0006 | -1.4964 H  |
| 24 H24 | 3.2147  | -0.8901 | -2.2953 H  |

|        |         |         |           |
|--------|---------|---------|-----------|
| 25 H25 | 3.2149  | 0.8892  | -2.2954 H |
| 26 C26 | 3.2156  | -1.4228 | 0.7490 C  |
| 27 H27 | 2.9766  | -2.3543 | 0.2213 H  |
| 28 H28 | 4.3061  | -1.3219 | 0.8338 H  |
| 29 H29 | 2.7761  | -1.4782 | 1.7526 H  |
| 30 C30 | 3.2160  | 1.4223  | 0.7488 C  |
| 31 H31 | 4.3064  | 1.3212  | 0.8336 H  |
| 32 H32 | 2.9771  | 2.3537  | 0.2210 H  |
| 33 H33 | 2.7765  | 1.4780  | 1.7524 H  |
| 34 H34 | 0.4145  | -0.0004 | -2.1730 H |
| 35 H35 | -0.4149 | 0.0004  | -2.1729 H |

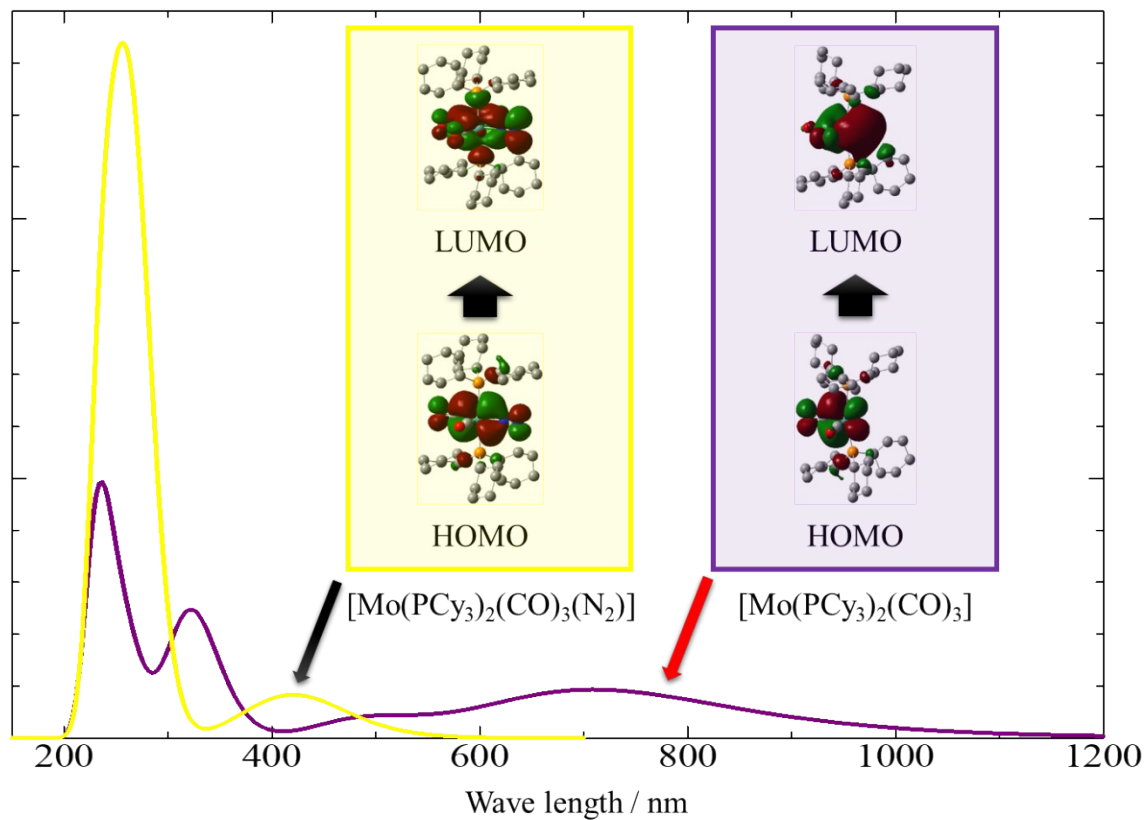

Fig. S16 Absorption spectra of  $[\text{Mo}(\text{PCy}_3)_2(\text{CO})_3(\text{N}_2)]$  and  $[\text{Mo}(\text{PCy}_3)_2(\text{CO})_3]$  by time dependent (TD)-DFT calculation.

## References

- S1 Gaussian 16, Revision C.01, Frisch, M. J.; Trucks, G. W.; Schlegel, H. B.; Scuseria, G. E.; Robb, M. A.; Cheeseman, J. R.; Scalmani, G.; Barone, V.; Petersson, G. A.; Nakatsuji, H.; Li, X.; Caricato, M.; Marenich, A. V.; Bloino, J.; Janesko, B. G.; Gomperts, R.; Mennucci, B.; Hratchian, H. P.; Ortiz, J. V.; Izmaylov, A. F.; Sonnenberg, J. L.; Williams-Young, D.; Ding, F.; Lipparini, F.; Egidi, F.; Goings, J.; Peng, B.; Petrone, A.; Henderson, T.; Ranasinghe, D.; Zakrzewski, V. G.; Gao, J.; Rega, N.; Zheng, G.; Liang, W.; Hada, M.; Ehara, M.; Toyota, K.; Fukuda, R.; Hasegawa, J.; Ishida, M.; Nakajima, T.; Honda, Y.; Kitao, O.; Nakai, H.; Vreven, T.; Throssell, K.; Montgomery, J. A., Jr.; Peralta, J. E.; Ogliaro, F.; Bearpark, M. J.; Heyd, J. J.; Brothers, E. N.; Kudin, K. N.; Staroverov, V. N.; Keith, T. A.; Kobayashi, R.; Normand, J.; Raghavachari, K.; Rendell, A. P.; Burant, J. C.; Iyengar, S. S.; Tomasi, J.; Cossi, M.; Millam, J. M.; Klene, M.; Adamo, C.; Cammi, R.; Ochterski, J. W.; Martin, R. L.; Morokuma, K.; Farkas, O.; Foresman, J. B.; Fox, D. J. Gaussian, Inc., Wallingford CT, 2016.
- S2 GaussView, Version 6, Dennington, Roy; Keith, Todd A.; Millam, John M. Semicem Inc., Shawnee Mission, KS, 2016.
- S3 Rani, M. A. A.; Borduas, N.; Colquhoun, V.; Hanley, R.; Johnson, H.; Larger, S.; Lickiss, P. D.; Llopis-Mestre, V.; Luu, S.; Mogstad, M.; Oczipka, P.; Sherwood, J. R.; Welton, T.; Xing, J. Y. The potential of methylsiloxanes as solvents for synthetic chemistry applications. *Green Chem.* **2014**, *16*, 1282–1296.
